1 **Massively parallel transposon mutagenesis identifies temporally essential genes for biofilm**  
2 **formation in *Escherichia coli***

3

4 **Authors:** Emma R Holden<sup>1</sup>, Muhammad Yasir<sup>1</sup>, A Keith Turner<sup>1</sup>, John Wain<sup>1,2</sup>, Ian G. Charles<sup>1,2</sup>,  
5 Mark A Webber<sup>1,2</sup> \*

6

7 <sup>1</sup> Quadram Institute Bioscience, Norwich Research Park, Norwich, Norfolk, NR4 7UQ, U.K.

8 <sup>2</sup> Medical School, University of East Anglia, Norwich Research Park, Norwich, Norfolk, NR4 7TJ,  
9 U.K.

10

11 \* Corresponding author [Mark.Webber@quadram.ac.uk](mailto:Mark.Webber@quadram.ac.uk)

12

13 **Keywords:** Functional genomics, transposon mutagenesis, adhesion, TraDIS

14

15 **Running title:** *E. coli* TraDIS biofilm

16 **Abstract**

17 Biofilms complete a life cycle where cells aggregate, grow and produce a structured community  
18 before dispersing to seed biofilms in new environments. Progression through this life cycle requires  
19 controlled temporal gene expression to maximise fitness at each stage. Previous studies have  
20 focused on the essential genome for the formation of a mature biofilm, but here we present an  
21 insight into the genes involved at different stages of biofilm formation. We used TraDIS-Xpress; a  
22 massively parallel transposon mutagenesis approach using transposon-located promoters to assay  
23 expression of all genes in the genome. We determined how gene essentiality and expression  
24 affects the fitness of *E. coli* growing as a biofilm on glass beads after 12, 24 and 48 hours. A  
25 selection of genes identified as important were then validated independently by assaying biofilm  
26 biomass, aggregation, curli biosynthesis and adhesion ability of defined mutants. We identified 48  
27 genes that affected biofilm fitness including genes with known roles and those not previously  
28 implicated in biofilm formation. Regulation of type 1 fimbriae and motility were important at all time  
29 points. Adhesion and motility were important for the early biofilm, whereas matrix production and  
30 purine biosynthesis were only important as the biofilm matured. We found strong temporal  
31 contributions to biofilm fitness for some genes including some which were both beneficial and  
32 detrimental depending on the stage at which they are expressed, including *dksA* and *dsbA*. Novel  
33 genes implicated in biofilm formation included *ychM* and *truA* involved in cell division, *crfC* and  
34 *maoP* in DNA housekeeping and *yigZ* and *ykgJ* of unknown function. This work provides new  
35 insights into the requirements for successful biofilm formation through the biofilm life cycle and  
36 demonstrates the importance of understanding expression and fitness through time.

## 37 **Introduction**

38 Bacteria rarely exist planktonically outside of the laboratory and are usually found as part of  
39 structured, aggregated communities called biofilms <sup>1</sup>. Clinically, approximately 80% of infections  
40 have been suggested to have a biofilm component <sup>2</sup>. Biofilm related infections are complicated by  
41 their intrinsic tolerance to antimicrobials, making infections difficult to treat and, often persistent <sup>3-6</sup>.  
42 Cells within a biofilm grow more slowly than those in planktonic culture and this reduced level of  
43 metabolic activity has been associated with tolerance to antimicrobials, allowing biofilms to be  
44 typically 10-1000-fold less sensitive to antibiotics than corresponding strains in planktonic  
45 conditions <sup>7,8</sup>. Aside from the clinical setting, there are many useful applications of biofilms,  
46 including wastewater treatment and bioprocessing <sup>9</sup>. Biofilms undergo a life cycle that commonly  
47 consists of initial attachment to a surface, growth and maturation of the biofilm over time with  
48 characteristic production of extracellular matrix components, followed by dispersal of planktonic  
49 cells to facilitate colonisation of new surfaces <sup>10</sup>. The switch between planktonic and biofilm  
50 lifestyles is driven by environmental stimuli promoting large scale changes in gene expression and  
51 regulation that are necessary to support the bacterial community through the life cycle, which is  
52 distinct to planktonic growth conditions. Expressing the right genes at the right time and place is  
53 critical for efficient production of a biofilm.

54

55 The main components of the biofilm extracellular matrix in *E. coli* are the amyloid protein curli, the  
56 polysaccharide cellulose and extracellular DNA <sup>11</sup>. Curli is transcribed by the divergent operons  
57 *csgBAC* and *csgDEFG*, with curli biosynthesis regulated by CsgD <sup>12</sup>. Cellulose biosynthetic  
58 machinery is encoded by *bcsRQABZC* and *bcsEFG*, and its production is regulated by c-di-GMP  
59 <sup>13</sup>. Several genes are known to be involved in the regulation of matrix production, including *ompR*  
60 <sup>14,15</sup>, *cpxR* <sup>14,16,17</sup> and *rpoS* <sup>18,19</sup>, amongst others <sup>20-22</sup>. Extracellular DNA is also an important  
61 component of the biofilm matrix, and the addition of DNase has negatively affected the biomass of  
62 biofilms formed by *Pseudomonas aeruginosa* <sup>23</sup>, *Bacillus cereus* <sup>24</sup> and a range of Gram-negative  
63 pathogens, including *E. coli* <sup>25</sup>.

64

65 Previous studies focusing on identifying the genes and pathways required for biofilm formation in  
66 *E. coli* have concentrated on the mature biofilm rather than dissecting events across the life cycle.  
67 Various studies have taken a genome wide approach to identifying genes that impact biofilm  
68 formation. One assessed biofilm formation of all the mutants in the Keio collection <sup>26</sup>, although  
69 analysis is limited to the effect of inactivation <sup>27</sup>. DNA microarrays have also been used to link the  
70 presence of different genes with biofilm capacity in panels of isolates <sup>28</sup>. Large scale transposon  
71 mutagenesis are high-throughput, sensitive whole genome approaches to link phenotype to  
72 genotype methodologies <sup>29-31</sup>. These methods are limited by an inability to assay essential genes  
73 where transposon insertions are not viable. We sought to investigate biofilm formation using  
74 TraDIS-Xpress, a method developed recently which allows essential genes to be assayed for their  
75 role in survival in test conditions. In this method, gene expression changes caused by an outward-  
76 facing inducible promoter incorporated into the transposon are captured as well as traditional  
77 essentiality measurements <sup>32</sup>.

78

79 This study identified 48 genes that were found to be important at different stages of biofilm  
80 formation by *E. coli*. By investigating the genes important across the biofilm life cycle, we were  
81 able to get a dynamic view of the main pathways important at different stages of biofilm  
82 development. Genes identified by TraDIS-Xpress as important at each stage were then  
83 phenotypically validated using defined mutants. Our findings reinforced the importance of  
84 adhesion, motility and matrix production in the biofilm, and revealed the importance of genes not  
85 previously implicated in biofilm formation. This included genes with roles in cell division (*ychM* and  
86 *truA*), DNA housekeeping (*crfC* and *maoP*) and *yigZ* and *ykgJ*, the functions of which have not  
87 been elucidated. We identified clear requirements for some pathways at specific points of the  
88 biofilm life cycle, furthering our understanding of how biofilms maintain fitness over time.

## 89 **Results**

90 Analysis of the TraDIS-Xpress data found 48 genes that considerably affected biofilm formation  
91 over time in *E. coli*: 42 were identified as being needed to maintain the fitness of a biofilm and  
92 expression of 6 genes was predicted to result in reduced biofilm fitness (Figure 1 and  
93 Supplementary table 1). The main pathways that were consistently important in the biofilm through  
94 all the time points included type 1 fimbriae, curli biosynthesis and regulation of flagella (Figure 1).  
95 All other loci identified affected biofilm formation at specific points in the life cycle.

96

### 97 Fimbriae expression and motility are important at all stages of biofilm formation

98 Only 4 genes were found to be important throughout 12, 24 and 48 hours (figure 2a). These  
99 included *fimB* and *fimE*. The recombinase gene *fimB* which helps mediate both 'ON-to-OFF' and  
100 'OFF-to-ON' switching of fimbriae expression was beneficial for biofilm formation at all time points.  
101 Fewer *fimB* mutants were observed in biofilm conditions compared to planktonic, and this number  
102 decreased over time. In contrast, inactivation of *fimE*, responsible for only 'ON-to-OFF' fimbrial  
103 regulation<sup>33</sup>, increased biofilm fitness at all time points. Initially, there were only slightly more *fimE*  
104 mutants in biofilm conditions compared to planktonic at 12 hours, but this increased over time with  
105 a stark contrast seen between biofilm and planktonic conditions at the 24 and 48 hour time points.  
106 The predicted impacts on biofilm formation were phenotypically validated by testing both gene  
107 knockout mutants from the Keio collection (which contains two, independent deletion mutants for  
108 most genes in *E. coli* BW25113)<sup>34</sup>. Analysis of these mutants showed for both that there was no  
109 deficit in biofilm biomass (Figure 3a), but both were deficient in cell aggregation (Figure 3b).  
110 Together, the TraDIS-Xpress and phenotypic data suggest that the ability to regulate fimbriae  
111 expression in a phase-dependent manner is important for fitness of a biofilm, rather than being  
112 constrained in a fimbriae 'ON' or 'OFF' state.

113

114 Disruption of *LrhA*, a regulator of motility and chemotaxis<sup>35</sup>, was beneficial for biofilm formation at  
115 all time points (Figure 2b). LrhA also has a role in type 1 fimbriae expression through activating  
116 expression of *fimE*<sup>36</sup>, but in addition represses flagella-mediated motility. Analysis of the  $\Delta$ *LrhA*

117 biofilm showed initial formation of microcolonies occurred faster than the wild-type (Figure 4) but at  
118 later time points the biofilms formed by this mutant were less mature than seen with the wild-type.  
119 There was no significant change in biomass formed by this mutant (Figure 3a) and mutants  
120 appeared less aggregative than the wild-type (Figure 3b). These data suggest that inactivation of  
121 *lrhA* impacts both adhesion and aggregation differently at distinct stages of the biofilm life cycle  
122 and may result in a benefit to early surface colonisation but with a cost to later maturation.

123

124 Expression of the Hha toxin attenuator *tomB* was also found to be consistently important for biofilm  
125 formation at 12, 24 and 48 hours (Figure 2b). Consistent with this prediction, the  $\Delta tomB$  mutant  
126 biofilm had reduced cell aggregation and curli biosynthesis, and reduced biofilm biomass (Figure 3  
127 a,b,c).

128

### 129 Regulatory genes are important in the early biofilm

130 In the early biofilm, at 12 hours growth, only 13 genes were found to distinguish the planktonic and  
131 biofilm conditions. TraDIS-*Xpress* data indicated that inactivation of transcriptional factor *dksA*  
132 promoted biofilm formation at the 12- and 24-hour time points but not in the mature biofilm (Figure  
133 2c). Supporting this, analysis of  $\Delta dksA$  mutant biofilms under flow conditions showed an initial  
134 benefit with increased adhesion at both the 12 and 24 hour time points, but reduced microcolony  
135 formation at the 48 hour time point, suggesting *dksA* affects biofilm initiation (Figure 4). Inactivation  
136 of  $\Delta dksA$  was also seen to reduce cell aggregation, curli biosynthesis and biofilm biomass (Figure  
137 3 a,b,c). Expression of *hdfR*, a negative regulator of motility<sup>37</sup>, was found to be detrimental to  
138 biofilm fitness in the early biofilm after 12 and 24 hours growth (Figure 2b), and  $\Delta hdfR$  mutant  
139 biofilms had significantly reduced biomass (Figure 3a). In addition, the stress response regulator  
140 *marR*<sup>38</sup> and the 23S rRNA methyltransferase *rlmI*<sup>39</sup> were both found to be beneficial for biofilm  
141 fitness at the 12 hour time point only, and reduced biofilm biomass was found in deletion mutants  
142 (figure 3a). These genes have both previously been implicated in biofilm formation<sup>39-41</sup>, but the  
143 effect on early biofilm formation has not been described previously.

144

145 Biofilms sampled after 24 hours demonstrate both adhesion and matrix production are important

146 More pathways were identified as being important to biofilm formation at 24 hours that at 12 hours.

147 Two genes involved in DNA housekeeping were found to be involved in biofilm formation at this  
148 time point. These included *dam*, encoding DNA methyltransferase<sup>42</sup>, insertional activation of which  
149 was not tolerated in the 24 hour biofilm, and  $\Delta dam$  mutants were defective in aggregation  
150 compared to the wild type (figure 3b). Also, inactivation of *maoP*, involved in Ori macrodomain  
151 organisation<sup>43</sup>, was predicted to confer a fitness advantage in the 24 hour biofilm compared to the  
152 planktonic condition. TraDIS-*Xpress* data showed more reads mapped to *maoP* in the biofilm  
153 conditions compared to the planktonic at 24 hours suggesting loss of this gene was beneficial.  
154 Phenotypic analysis of the  $\Delta maoP$  mutant biofilm did demonstrate a phenotype although in  
155 opposition to the prediction, *maoP* mutants were significantly deficient in biofilm biomass  
156 production, curli biosynthesis and one mutant displayed reduced aggregation (Figure 3 a,c).

157

158 In the 12 and 24 hour biofilms, *dsbA* (encoding disulphide oxidoreductase) was essential with no  
159 insertions detected within this gene (Figure 2c). The role of *dsbA* in adhesion to abiotic surfaces  
160 and epithelial cells has previously been suggested (Lee et al., 2008, Bringer et al., 2007).

161 Phenotypic validation of the  $\Delta dsbA$  mutant showed a red, dry and rough (*rdar*) phenotype on  
162 Congo red plates (Figure 3c), indicative of increased curli biosynthesis. Cell aggregation in the  
163  $\Delta dsbA$  mutant was significantly improved compared to the wild type, implying a role of *dsbA* in  
164 inhibiting cell-cell aggregation. Our data showed that *dsbA* is important in the early biofilm, but its  
165 deletion appears to be beneficial to the formation of a mature biofilm, according to the Congo red  
166 and aggregation data. Supporting this hypothesis, *dsbA* was not essential at the 48 hour time  
167 point.

168

169 Inactivation of the RNase III modulator *ymdB*<sup>44</sup> was found to reduce fitness in the biofilm, with  
170 fewer reads mapping here in biofilm conditions compared to planktonic at both the 24 and 48 hour  
171 time points. This follows previous findings that both inactivation and overexpression of *ymdB*

172 negatively affects biofilm biomass<sup>44</sup>. In concordance with these findings, a  $\Delta ymdB$  mutant had  
173 significantly improved cell aggregation and reduced biofilm biomass (figure 3 a,b).

174

175 Curli biosynthesis became important by the 24 hour time point as no insertions mapped to *csgC*,  
176 encoding a curli subunit chaperone<sup>45</sup> and more transposon insertions mapped upstream of the  
177 curli biosynthesis regulator *csgD*<sup>12</sup>, likely indicating its increased expression benefitted biofilm  
178 formation. At the 48 hour time point, both genes were essential for biofilm formation, which was  
179 also the case for the known *csgD* regulator, *ompR*<sup>14</sup>, supported by significantly reduced biofilm  
180 biomass and reduced aggregation in knockout mutants (figure 3a,b).

181

182 The mature biofilm grown for 48 hours requires purine biosynthesis, matrix production, motility and  
183 solute transport

184 There were 38 genes found to be important for fitness of the mature biofilm after 48 hours growth,  
185 and 25 of these genes were identified as essential at this time point only. The major pathway  
186 implicated in biofilm formation at 48 hours was purine ribonucleotide biosynthesis, with four genes,  
187 *purD*, *purH*, *purL* and *purE*<sup>46</sup>, found to be essential at this time point only. TraDIS-Xpress did not  
188 identify mutants in any of these genes in biofilms sampled at 48 hours, whereas several reads  
189 mapped to these loci under planktonic conditions, as well as under both biofilm and planktonic  
190 conditions earlier at 12 and 24 hours. Visualisation of a  $\Delta purD$  mutant biofilm under flow conditions  
191 saw poor biofilm formation and no microcolony formation at any time compared to the wild type  
192 (Figure 4). Additionally,  $\Delta purD$  and  $\Delta purE$  mutants were deficient in biofilm biomass production,  
193 curli biosynthesis, and  $\Delta purE$  also showed reduced cell aggregation (Figure 3 a,b,c), confirming an  
194 important role for purine biosynthesis in matrix production and curli biosynthesis in the mature  
195 biofilm.

196

197 The flagella master regulatory system *flhDC* was identified as important in the mature biofilm.  
198 Biofilms sampled after 48 hours saw fewer *flhC* mutants, while insertions interpreted as over-  
199 expressing *flhD* increased in numbers both at the 24 and 48 hour time points, compared to



200 planktonic conditions. No mutants in *flgD* and *fliE*, encoding flagellar filament proteins, were  
201 identified at 24 and 48 hours, respectively. It has previously been shown that motility is important  
202 for initial biofilm formation <sup>47,48</sup>, but this may not relate to biomass formation where no differences  
203 were seen for  $\Delta flhD$ ,  $\Delta flhC$ ,  $\Delta fliE$  and  $\Delta flgD$  mutants.

204

205 Various pleiotropic transcriptional regulators were also important in the mature biofilm. This  
206 included the H-NS antagonist *leuO* <sup>49</sup>. Increased insertions upstream of *leuO* under biofilm  
207 conditions after 12 hours growth, as well as no *leuO* mutants in 48 hour biofilms, indicated it was  
208 beneficial to biofilm formation. A  $\Delta leuO$  mutant did not aggregate as well as the wild type, and one  
209  $\Delta leuO$  mutant had reduced biofilm biomass (figure 3 a,b). The  $\Delta leuO$  mutant biofilm under flow  
210 conditions demonstrated an inability to form microcolonies after 48 hours growth (figure 4). The  
211 leucine-responsive global regulator *Irp* <sup>50</sup> and a transcriptional regulator responsible for survival  
212 under acid stress, *gadW* <sup>51</sup> were also found to have fewer mutants in the 48 hour biofilm compared  
213 to the planktonic condition, indicating their importance in the mature biofilm. Reduced biofilm  
214 biomass, aggregation and curli biosynthesis were observed for one copy of  $\Delta Irp$ , but no differences  
215 in biofilm formation or aggregation were seen for  $\Delta gadW$  mutant biofilms (figure 3 a,b,c).

216

217 Inactivation of the outer membrane channels *mscL* <sup>52</sup>, *tolC* <sup>53</sup> and *ompF* <sup>54</sup> was not tolerated in the  
218 mature biofilm grown for 48 hours. This would indicate the importance of transport in the mature  
219 biofilm, however inactivation of *tolC* and *ompF* did not result in a change in biofilm biomass (figure  
220 3a).

221 Three genes involved in cell division or DNA replication, *crfC*, *yhcM* and *truA*, were identified as  
222 important in the 48 hour biofilm. Expression of *yhcM*, involved in cell division <sup>55</sup> was predicted to be  
223 essential in the 48 hour biofilm, but this was not reflected in the phenotype of deletion mutants  
224 (Figure 3 a). The pseudouridine synthase *truA* <sup>56</sup>, also reported to be involved in cell division <sup>57</sup> was  
225 found to be essential in the mature biofilm grown for 24 and 48 hours. Although a  $\Delta truA$  mutant  
226 showed no change in biofilm biomass or curli biosynthesis, aggregation was significantly improved

227 compared to the wild type albeit to a small degree (figure 3b), contrary to the prediction generated  
228 by TraDIS-*Xpress*.

## 229 Discussion

230 We have characterised the essential genome of *E. coli* biofilms across the biofilm lifecycle by using  
231 the high throughput transposon mutagenesis screen TraDIS-*Xpress*. The identification of genes  
232 and pathways already described to be involved in biofilm formation validates the efficacy of this  
233 experimental model. The early biofilm established 12 hours after inoculation was characterised by  
234 genes involved in adhesion. The 24-hour biofilm required both adhesion and matrix production,  
235 transitioning into matrix production being of the upmost importance in the mature biofilm after 48  
236 hours. Control of fimbriae expression and motility remained important at each stage of the biofilm  
237 life cycle rather than just being involved in initial attachment.

238

239 As well as identifying known pathways, TraDIS-*Xpress* was also able to identify genes not  
240 previously known to be involved in biofilm formation, including *yigZ*, *ykgJ*, *ychM*, *maoP*, *truA*, *crfC*.  
241 We found that expression of *maoP* was detrimental to the fitness of biofilms grown for 24 hours,  
242 but a  $\Delta$ *maoP* mutant biofilm had reduced biofilm biomass and reduced curli biosynthesis compared  
243 to the wild type. Chromosomal organisation of the Ori macrodomain requires both *maoP* and *maoS*  
244 <sup>43</sup>, however no signal is seen in our data for *maoS*. This warrants further investigation into how  
245 chromosomal macrodomain organisation affects biofilm formation. The importance of cell division  
246 in the mature biofilm was further supported by our findings of fewer *ychM* and *truA* mutants  
247 compared to planktonic conditions, both of which have not before been implicated in biofilm  
248 formation. However, deletion of either gene had no effect on biofilm biomass or curli production,  
249 and the  $\Delta$ *truA* deletion mutant had improved aggregation compared to the wild type. Genes  
250 involved in cell division are clearly important for the fitness of the mature biofilm, but the essential  
251 roles of *ychM* and *truA* in this process are currently unclear but unlikely to relate to crude biomass  
252 production.

253

254 Expression of *dsbA* and repression of *dksA* was found in this study to benefit early biofilm fitness.  
255 Based on previous studies and phenotypic analysis of knockout mutants in this study, we believe  
256 the increase in biofilm fitness seen is due to increased adhesion in these mutants <sup>58,59</sup>. This study

257 has highlighted the benefit of close temporal gene regulation in the biofilm, where the expression  
258 of certain genes can have a different effect on biofilm fitness at different stages of the biofilm life  
259 cycle. For example, we found that *dsbA* was important for the early biofilm, but a *dsbA* mutant  
260 biofilm had increased curli expression and increased aggregation. Expression of *dsbA* has been  
261 previously found to result in repression of the curli regulator *csgD* and curli subunit *csgA*, essential  
262 for optimal fitness of the mature biofilm<sup>60</sup>. Conversely, we found that expression of the  
263 transcription factor *dksA* was detrimental in the early biofilm, whilst a *dksA* knockout biofilm had  
264 reduced biofilm biomass, reduced curli biosynthesis and reduced aggregation. The relationship  
265 between *dksA* expression and curli biosynthesis has been previously characterised in similar  
266 studies<sup>31,61</sup>. Again, these data show differential expression of important genes at different stages  
267 of the biofilm life cycle is essential for optimising biofilm fitness.

268

269 Purine biosynthesis was found to be important in the mature biofilm, through the essentiality of  
270 *purD*, *purE*, *purL* and *purH* in biofilms grown for 48 hours. Similar findings have previously been  
271 described in another transposon mutagenesis experiment in uropathogenic *E. coli*<sup>31</sup>. Inactivation  
272 of purine biosynthetic genes was also found to impair biofilm formation in *Bacillus cerus*, but this  
273 was thought to be due to reduced extracellular DNA in the biofilm matrix<sup>24</sup>. Extracellular DNA is  
274 thought to aid adhesion and has been found to be important in the biofilms of a wide range of  
275 bacterial species<sup>23,25</sup>. Our data suggest the importance is in the mature biofilm rather than initial  
276 adhesion. A relationship between both purine and pyrimidine biosynthesis and curli production in  
277 the biofilm has been reported<sup>31,61,62</sup>. More recently, curli biosynthesis in a *purL* mutant was  
278 reported to be abrogated through addition of inosine, which is involved in the *de novo* purine  
279 biosynthetic pathway for production of adenosine monophosphate (AMP) and guanine  
280 monophosphate (GMP)<sup>63</sup>. This suggests that nucleotide production itself, rather than the  
281 regulatory effects of the genes involved, affects curli biosynthesis, supporting one hypothesis that  
282 disruption of the purine biosynthetic pathway may directly result in a reduction of cyclic-di-GMP,  
283 known to regulate biofilm formation and affect curli biosynthesis<sup>31</sup>. Quantification of intracellular c-

284 di-GMP or further investigation of other c-di-GMP-dependent pathways in these mutants would  
285 uncover the relationship between these pathways and biofilm formation.

286

287 TraDIS-*Xpress* data suggested that expression of *fimB* and deletion of *fimE* was necessary for  
288 optimal biofilm fitness at all points in the biofilm, rather than just for initial attachment. Analysis of  
289  $\Delta$ *fimB* and  $\Delta$ *fimE* deletion mutants found no significant change in biofilm biomass and reduced  
290 cell-cell aggregation. Previous work has observed a positive correlation between type 1 fimbriae  
291 and exopolysaccharide production in the mature biofilm<sup>64</sup>, but the increase in biofilm biomass to  
292 support this was not seen in our study. These data suggest that for a population the ability to  
293 present cells both with and without fimbriae is beneficial for fitness throughout the life cycle.

294

295 Analysis of biofilms under flow conditions found that  $\Delta$ *lrhA* and  $\Delta$ *tomB* mutant biofilms had a  
296 similar appearance after 12 hours growth, could potentially indicate a similar role in the biofilm. The  
297 role of *lrhA* in motility regulation has been well documented<sup>35,36,65</sup>, and expression of *tomB* has  
298 been seen to reduce motility through repression of *fliA*<sup>66</sup>. We found deletion of either *lrhA* or *tomB*  
299 resulted in reduced aggregation. Although  $\Delta$ *lrhA* and  $\Delta$ *tomB* deletion mutants shared many similar  
300 phenotypes, TraDIS-*Xpress* data predicted that *tomB* was beneficial and *lrhA* was detrimental to  
301 biofilm formation at 12, 24 and 48 hours. Previous studies on  $\Delta$ *lrhA* mutant biofilms have reported  
302 increased adhesion, aggregation and biomass compared to the wild type<sup>36</sup>. This was not seen in  
303 our study, but we did find aggregation of the  $\Delta$ *lrhA* mutant changed over time, with increased  
304 aggregates seen in biofilms grown in flow cells after 12 hours (figure 4). However, decreased  
305 aggregation was observed in planktonic cultures after 24 hours (figure 3). The initial benefit to  
306 biofilm formation resulting from the inactivation of *lrhA* predicted by the TraDIS-*Xpress* data agrees  
307 with the initial phenotype of the  $\Delta$ *lrhA* biofilm in the flow cells. This may be due to reduced  
308 induction of *fimE* by *lrhA*<sup>36</sup>, thereby allowing expression of type 1 fimbriae to facilitate adhesion.  
309 We have already described how expression of both *fimB* and *fimE* is necessary for optimal fitness  
310 of the mature biofilm, and the effect of *lrhA* on biofilm formation correlates with these findings, with  
311 reduced aggregation in  $\Delta$ *lrhA* biofilms after 24 hours (also seen in *fimB* and *fimE* mutants) and no

312 microcolony formation under flow conditions at 24 and 48 hours. Therefore, the importance of *IrhA*  
313 to biofilm formation clearly appears to be time dependent, with the most important role in early  
314 events.

315

316 Studies on the effect of *tomB* on biofilm formation have focused on its toxin-antitoxin relationship  
317 with *hha*, which has been found to reduce expression of fimbrial subunit *fimA* and activate  
318 prophage lytic genes causing cell death<sup>67</sup>. Deletion of *hha* was found to reduce motility through  
319 *flhDC* and increase curli production through *csgD*<sup>68</sup>. We found no obvious benefit to biofilm fitness  
320 with insertional inactivation of *hha*, but this may not be visible in our data due to these mutants  
321 having a functional copy of *tomB*. The role of *tomB* in the biofilm has not previously been  
322 suggested, but we predict *tomB* is involved in regulation of adhesion in the early biofilm and matrix  
323 biosynthesis in the late biofilm.

324

325 The relationship between motility and biofilm formation is complex. Although it is widely understood  
326 that motility is crucial for biofilm formation<sup>47,48</sup>, it is also true that motility and curli production have  
327 an inverse relationship, where *csgD* directly represses *fliE*<sup>69</sup> and induces c-di-GMP synthesis  
328 through *adrA*, which reduces motility through *ycgR*<sup>70-72</sup>. This is often referred to as a lifestyle  
329 'switch', where biofilm matrix production represses motility for a motile-to-sessile lifestyle transition  
330<sup>73</sup>. We found that although insertional inactivation of negative motility regulators *IrhA* and *hdfR*  
331 improved biofilm fitness according to the TraDIS-*Xpress* data, a  $\Delta hdfR$  deletion mutant actually  
332 had reduced biofilm biomass, and deletion of either *IrhA* or *hdfR* impaired cell aggregation. Our  
333 data found an important role for structural flagella components in the mature biofilm. Previous work  
334 has suggested that flagella filaments are important for initial attachment and adhesion<sup>74</sup>, however  
335 we did not find this to be the case, with the expression of flagella filaments only appearing to  
336 increase biofilm fitness in the mature biofilm grown for 48 hours. It appears that regulation of  
337 flagella and motility, rather than their fixed expression or absence, is important for optimal biofilm  
338 fitness.

339

340 Previous genome-wide screens on *E. coli* biofilms have identified some of the same genes as this  
341 study<sup>26,29,31</sup>. The TraDIS-*Xpress* technology used here makes for a more a powerful analysis of  
342 biofilm formation by predicting roles of changes in gene expression as well as essentiality and by  
343 analysing important genes over time. Differences between this work and previous studies may  
344 reflect biofilms being grown under different conditions on different surfaces, as these  
345 environmental factors greatly affect the pattern of gene expression and gene essentiality in the  
346 biofilm<sup>75</sup>. Analysis of more strains and species, grown on different abiotic and biotic surfaces  
347 under a range of environmental conditions may provide a wider list of essential genes for biofilm  
348 formation shared amongst a majority of human pathogens, as well as substrate-, condition- and  
349 species-specific genes and pathways for specific industrial, clinical and drug-development  
350 applications. As well as temporal changes in gene expression, spatial changes have been shown  
351 to affect biofilm development<sup>76</sup>. Integration of the spatial component into this model, to assay how  
352 gene expression throughout the biofilm over time affects biofilm fitness, would be the next logical  
353 step in furthering our understanding of biofilm development.

354

355 This study had revealed important time-specific roles for known and novel genes in biofilm  
356 formation. We reveal some pathways have a more important role in the mature biofilm than  
357 previously appreciated and identify genes with time dependent conditional essentiality within the  
358 biofilm. We also identify potential new candidate genes essential for biofilm formation, which could  
359 be targeted for novel anti-biofilm therapies. Further work using high-density transposon mutant  
360 libraries across time and in different conditions is likely to further our understanding of biofilm  
361 biology.

362

## 363 **Methods**

### 364 Transposon mutant library

365 The *E. coli* BW25113 transposon mutant library containing over 800,000 distinct mutants that was  
366 used in this study has recently described<sup>32</sup>. The transposon used to construct this library  
367 incorporates an outward-transcribing IPTG-inducible promoter.

368

### 369 Biofilm model conditions

370 The library was used to inoculate parallel cultures of 5 mL LB broth (without salt) with  
371 approximately  $10^7$  cells. Cultures were grown in 6-well plates containing 40 sterile 5 mm glass  
372 beads per well (Sigma, 18406). Two replicates were set up, with or without 1 mM IPTG. Plates  
373 were incubated at 30 °C with light shaking for 48 hours. After 12, 24, and 48 hours of incubation, 2  
374 mL of planktonic sample was collected from each culture and 70 beads were taken to constitute  
375 the biofilm sample. Beads were washed twice in sterile PBS and vortexed in tubes containing PBS  
376 to resuspend cells from the biofilm. Both planktonic and biofilm samples were centrifuged at 2100 x  
377 g to form pellets for DNA extraction.

378

### 379 TraDIS-Xpress Sequencing

380 DNA was extracted from pellets following the protocol described in Trampari, et al.<sup>77</sup>. A  
381 customised sequencing library was prepared to identify transposon insertions. DNA was  
382 tagmented using a MuSeek DNA fragment library preparation kit (ThermoFisher) and customised  
383 Tn5-i5 and i7 primers were used in PCR for 28 cycles<sup>32</sup>. DNA fragments of 300-500 bp were size  
384 selected using AMPure beads (Beckman Coulter) and nucleotide sequences were generated using  
385 a NextSeq 500 and a NextSeq 500/550 High Output v2 kit (75 cycles) (Illumina).

386

### 387 Informatics

388 Fastq files were aligned to the *E. coli* BW25113 reference genome (CP009273) using the  
389 BioTraDIS (version 1.4.3) software suite<sup>78</sup> using SMALT (version 0.7.6). Insertion frequencies  
390 were determined per gene using tradis\_gene\_insert\_sites within the BioTraDIS toolkit. Insertion



391 frequencies per gene for each replicate were plotted against each other to determine the  
392 experimental error between replicates as well as differences in insertion frequency between control  
393 and test conditions (supplementary figure 1). The `tradis_comparison.R` command (also part of the  
394 BioTraDIS toolkit) was also used to determine significant differences ( $p < 0.05$ , after correction for  
395 false discovery) in insertion frequencies per gene between control and test conditions. For all  
396 candidate loci, plot files generated by BioTraDIS were also examined manually in Artemis (version  
397 17.0.1) <sup>79</sup> to confirm the results from these two approaches, as well as to identify regions where  
398 inserts were under differential selection but did not fall within coding regions of the genome.

399

#### 400 Validation experiments

401 Knockout mutants for genes identified by TraDIS-Xpress data were sourced from the Keio  
402 collection <sup>34</sup> and tested for their biofilm-forming abilities. Crystal violet assays, used to assess  
403 biofilm biomass production, were undertaken by inoculating  $10^4$  of each mutant strain into 200  $\mu\text{L}$   
404 LB broth without salt in a 96-well plate. After 48 hours incubation at 30 °C, the culture was  
405 removed, wells were rinsed with water, and the residual biofilms were stained for 10 minutes with  
406 200  $\mu\text{L}$  0.01% crystal violet. The plate was then rinsed with water to remove the stain and 200  $\mu\text{L}$   
407 70% ethanol was added to the wells to solubilise the stained biofilm. The optical density (OD) was  
408 measured using a FLUOstar Omega plate reader (BMG Labtech) at 590 nm. Cell aggregation was  
409 measured by leaving overnight cultures (normalised to an  $\text{OD}_{600\text{ nm}}$  of 0.3) on an unagitated surface  
410 at room temperature. After 24 hours, the supernatant of each culture was removed by pipetting,  
411 diluted in PBS and measured in a plate reader at 600 nm. Biofilm matrix composition was  
412 investigated through spotting 10  $\mu\text{L}$  of each mutant (representing  $10^5$  CFU) on agar supplemented  
413 with 40  $\mu\text{g}/\text{mL}$  Congo red (Sigma, C6277) to examine curli production. Plates were incubated at  
414 30°C for 48 hours and photographed to compare mutant biofilm composition to the wild type.  
415 Adhesion and biofilm architecture were investigated under flow conditions for selected mutants  
416 using the Bioflux system. Flow cells were primed with LB broth without salt at 5  $\text{dyne}/\text{cm}^2$  and  
417 seeded with approximately  $10^7$  cells. The plate was left at room temperature for 2.5 hours to allow  
418 attachment, and subsequently incubated at 30 °C at a flow rate of 0.3  $\text{dyne}/\text{cm}^2$ . After 12, 24 and

419 48 hours, biofilms were visualised with an inverted light microscope and representative images at  
420 10x, 20x and 40x magnification were taken at three locations of the flow cell. Experiments were  
421 performed in duplicate.

422 **Data availability**

423 Sequence data supporting the analysis in this study has been deposited in ArrayExpress.

424 Temporary accession number for review E-MTAB-9873.

425

426 **Code availability statement**

427 All software packages used are described in the methods. No bespoke code was used in this  
428 study.

429

430 **Acknowledgements**

431 ERH was supported by a studentship funded by the Quadram Institute Bioscience. The author(s)  
432 gratefully acknowledge the support of the Biotechnology and Biological Sciences Research  
433 Council (BBSRC); AKT, MY, JW, IGC and MAW were supported by the BBSRC Institute Strategic  
434 Programme Microbes in the Food Chain BB/R012504/1 and its constituent project  
435 BBS/E/F/000PR10349.

436

437 **Author contributions**

438 ERH designed and performed experiments, analysed the data and wrote the paper. AKT and IGC  
439 helped design experiments and wrote the paper. MY helped design experiments. JW heled  
440 analyse data and wrote the paper. MAW designed the experiments, analysed the data and wrote  
441 the paper.

442

443 **Competing interests**

444 The authors have no competing interests.

445 **References**

- 446 1 Berlanga, M. & Guerrero, R. Living together in biofilms: the microbial cell factory and its  
447 biotechnological implications. *Microbial Cell Factories* **15**, 165, doi:10.1186/s12934-016-  
448 0569-5 (2016).
- 449 2 Bjarnsholt, T. *et al.* Biofilm formation – What we can learn from recent developments. *J.*  
450 *Intern. Med.* **0**, doi:10.1111/joim.12782 (2018).
- 451 3 Gbejuade, H. O., Lovering, A. M. & Webb, J. C. The role of microbial biofilms in prosthetic  
452 joint infections. *Acta Orthop.* **86**, 147-158, doi:10.3109/17453674.2014.966290 (2015).
- 453 4 Davis, S. C., Martinez, L. & Kirsner, R. The diabetic foot: the importance of biofilms and  
454 wound bed preparation. *Curr. Diab. Rep.* **6**, 439-445 (2006).
- 455 5 Vestby, L. K., Gronseth, T., Simm, R. & Nesse, L. L. Bacterial Biofilm and its Role in the  
456 Pathogenesis of Disease. *Antibiotics (Basel, Switzerland)* **9**,  
457 doi:10.3390/antibiotics9020059 (2020).
- 458 6 Wang, H., Tay, M., Palmer, J. & Flint, S. Biofilm formation of *Yersinia enterocolitica* and its  
459 persistence following treatment with different sanitation agents. *Food Control* **73**, 433-437,  
460 doi:<https://doi.org/10.1016/j.foodcont.2016.08.033> (2017).
- 461 7 Mah, T.-F. *et al.* A genetic basis for *Pseudomonas aeruginosa* biofilm antibiotic resistance.  
462 *Nature* **426**, 306, doi:10.1038/nature02122  
463 <https://www.nature.com/articles/nature02122#supplementary-information> (2003).
- 464 8 Hoyle, B. D. & Costerton, J. W. Bacterial resistance to antibiotics: the role of biofilms. *Prog.*  
465 *Drug Res.* **37**, 91-105 (1991).
- 466 9 Flemming, H.-C. *et al.* Biofilms: an emergent form of bacterial life. *Nature Reviews*  
467 *Microbiology* **14**, 563, doi:10.1038/nrmicro.2016.94 (2016).
- 468 10 Kostakioti, M., Hadjifrangiskou, M. & Hultgren, S. J. Bacterial biofilms: development,  
469 dispersal, and therapeutic strategies in the dawn of the postantibiotic era. *Cold Spring*  
470 *Harb. Perspect. Med.* **3**, a010306-a010306, doi:10.1101/cshperspect.a010306 (2013).
- 471 11 Flemming, H.-C. & Wingender, J. The biofilm matrix. *Nature Reviews Microbiology* **8**, 623-  
472 633, doi:10.1038/nrmicro2415 (2010).

- 473 12 Barnhart, M. M. & Chapman, M. R. Curli Biogenesis and Function. *Annu. Rev. Microbiol.*  
474 **60**, 131-147, doi:10.1146/annurev.micro.60.080805.142106 (2006).
- 475 13 Serra, D. O. & Hengge, R. in *Extracellular Sugar-Based Biopolymers Matrices* (eds  
476 Ephraim Cohen & Hans Merzendorfer) 355-392 (Springer International Publishing, 2019).
- 477 14 Jubelin, G. *et al.* CpxR/OmpR Interplay Regulates Curli Gene Expression in Response to  
478 Osmolarity in *Escherichia coli*. *J. Bacteriol.* **187**, 2038-2049, doi:10.1128/jb.187.6.2038-  
479 2049.2005 (2005).
- 480 15 Vidal, O. *et al.* Isolation of an *Escherichia coli* K-12 Mutant Strain Able To Form Biofilms on  
481 Inert Surfaces: Involvement of a New *ompR* Allele That Increases Curli Expression. *J.*  
482 *Bacteriol.* **180**, 2442-2449 (1998).
- 483 16 Dorel, C., Vidal, O., Prigent-Combaret, C., Vallet, I. & Lejeune, P. Involvement of the Cpx  
484 signal transduction pathway of *E. coli* in biofilm formation. *FEMS Microbiol. Lett.* **178**, 169-  
485 175, doi:10.1111/j.1574-6968.1999.tb13774.x (1999).
- 486 17 Otto, K. & Silhavy, T. J. Surface sensing and adhesion of *Escherichia coli* controlled by the  
487 Cpx-signaling pathway. *Proceedings of the National Academy of Sciences* **99**, 2287-2292,  
488 doi:10.1073/pnas.042521699 (2002).
- 489 18 Adams, J. L. & McLean, R. J. Impact of *rpoS* deletion on *Escherichia coli* biofilms. *Appl.*  
490 *Environ. Microbiol.* **65**, 4285-4287 (1999).
- 491 19 Corona-Izquierdo, F. P. & Membrillo-Hernandez, J. A mutation in *rpoS* enhances biofilm  
492 formation in *Escherichia coli* during exponential phase of growth. *FEMS Microbiol. Lett.*  
493 **211**, 105-110 (2002).
- 494 20 Gerstel, U., Park, C. & Römling, U. Complex regulation of *csgD* promoter activity by global  
495 regulatory proteins. *Mol. Microbiol.* **49**, 639-654, doi:doi:10.1046/j.1365-2958.2003.03594.x  
496 (2003).
- 497 21 Gerstel, U. & Romling, U. The *csgD* promoter, a control unit for biofilm formation in  
498 *Salmonella* Typhimurium. *Res. Microbiol.* **154**, 659-667, doi:10.1016/j.resmic.2003.08.005  
499 (2003).

- 500 22 Amores, G. R., de las Heras, A., Sanches-Medeiros, A., Elfick, A. & Silva-Rocha, R.  
501 Systematic identification of novel regulatory interactions controlling biofilm formation in the  
502 bacterium *Escherichia coli*. *Sci. Rep.* **7**, 16768, doi:10.1038/s41598-017-17114-6 (2017).
- 503 23 Whitchurch, C. B., Tolker-Nielsen, T., Ragas, P. C. & Mattick, J. S. Extracellular DNA  
504 required for bacterial biofilm formation. *Science* **295**, 1487,  
505 doi:10.1126/science.295.5559.1487 (2002).
- 506 24 Vilain, S., Pretorius, J. M., Theron, J. & Brözel, V. S. DNA as an Adhesin: *Bacillus cereus*  
507 Requires Extracellular DNA To Form Biofilms. *Appl. Environ. Microbiol.* **75**, 2861,  
508 doi:10.1128/AEM.01317-08 (2009).
- 509 25 Tetz, G. V., Artemenko, N. K. & Tetz, V. V. Effect of DNase and Antibiotics on Biofilm  
510 Characteristics. *Antimicrob. Agents Chemother.* **53**, 1204, doi:10.1128/AAC.00471-08  
511 (2009).
- 512 26 Niba, E. T. E., Naka, Y., Nagase, M., Mori, H. & Kitakawa, M. A Genome-wide Approach to  
513 Identify the Genes Involved in Biofilm Formation in *E. coli*. *DNA Res.* **14**, 237-246,  
514 doi:10.1093/dnares/dsm024 (2008).
- 515 27 Aedo, S. J., Ma, H. R. & Brynildsen, M. P. Checks and Balances with Use of the Keio  
516 Collection for Phenotype Testing. *Methods Mol. Biol.* **1927**, 125-138, doi:10.1007/978-1-  
517 4939-9142-6\_9 (2019).
- 518 28 Schembri, M. A., Kjærsgaard, K. & Klemm, P. Global gene expression in *Escherichia coli*  
519 biofilms. *Mol. Microbiol.* **48**, 253-267, doi:doi:10.1046/j.1365-2958.2003.03432.x (2003).
- 520 29 Puttamreddy, S., Cornick, N. A. & Minion, F. C. Genome-Wide Transposon Mutagenesis  
521 Reveals a Role for pO157 Genes in Biofilm Development in *Escherichia coli* O157:H7  
522 EDL933. *Infect. Immun.* **78**, 2377, doi:10.1128/IAI.00156-10 (2010).
- 523 30 Goh, K. G. K. *et al.* Genome-Wide Discovery of Genes Required for Capsule Production by  
524 Uropathogenic *Escherichia coli*. *mBio* **8**, e01558-01517, doi:10.1128/mBio.01558-17  
525 (2017).

- 526 31 Nhu, N. T. K. *et al.* Discovery of New Genes Involved in Curli Production by a  
527 Uropathogenic *Escherichia coli* Strain from the Highly Virulent O45:K1:H7 Lineage. *mBio* **9**,  
528 e01462-01418, doi:10.1128/mBio.01462-18 (2018).
- 529 32 Yasir, M. *et al.* TraDIS-Xpress: a high-resolution whole-genome assay identifies novel  
530 mechanisms of triclosan action and resistance. *Genome Res*, doi:10.1101/gr.254391.119  
531 (2020).
- 532 33 Klemm, P. Two regulatory *fim* genes, *fimB* and *fimE*, control the phase variation of type 1  
533 fimbriae in *Escherichia coli*. *The EMBO Journal* **5**, 1389-1393, doi:10.1002/j.1460-  
534 2075.1986.tb04372.x (1986).
- 535 34 Baba, T. *et al.* Construction of *Escherichia coli* K-12 in-frame, single-gene knockout  
536 mutants: the Keio collection. *Mol. Syst. Biol.* **2**, 2006.0008-2006.0008,  
537 doi:10.1038/msb4100050 (2006).
- 538 35 Lehnen, D. *et al.* LrhA as a new transcriptional key regulator of flagella, motility and  
539 chemotaxis genes in *Escherichia coli*. *Mol. Microbiol.* **45**, 521-532, doi:10.1046/j.1365-  
540 2958.2002.03032.x (2002).
- 541 36 Blumer, C. *et al.* Regulation of type 1 fimbriae synthesis and biofilm formation by the  
542 transcriptional regulator LrhA of *Escherichia coli*. *Microbiology* **151**, 3287-3298,  
543 doi:10.1099/mic.0.28098-0 (2005).
- 544 37 Ko, M. & Park, C. H-NS-Dependent regulation of flagellar synthesis is mediated by a LysR  
545 family protein. *J. Bacteriol.* **182**, 4670-4672, doi:10.1128/jb.182.16.4670-4672.2000 (2000).
- 546 38 Alekshun, M. N. & Levy, S. B. Alteration of the Repressor Activity of MarR, the Negative  
547 Regulator of the *Escherichia coli marRAB* Locus, by Multiple Chemicals In Vitro. *J.*  
548 *Bacteriol.* **181**, 4669-4672 (1999).
- 549 39 Herzberg, M., Kaye, I. K., Peti, W. & Wood, T. K. YdgG (TqsA) controls biofilm formation in  
550 *Escherichia coli* K-12 through autoinducer 2 transport. *J. Bacteriol.* **188**, 587-598,  
551 doi:10.1128/jb.188.2.587-598.2006 (2006).
- 552 40 Holden, E. R. & Webber, M. A. MarA, RamA and SoxS as mediators of the Stress  
553 Response: Survival at a Cost. *Front. Microbiol.* **11**, 828 (2020).

- 554 41 Kettles, R. A. *et al.* The *Escherichia coli* MarA protein regulates the *ycgZ-ymgABC* operon  
555 to inhibit biofilm formation. *Mol. Microbiol.* **0**, doi:10.1111/mmi.14386 (2019).
- 556 42 Szyf, M. *et al.* DNA methylation pattern is determined by the intracellular level of the  
557 methylase. *Proc. Natl. Acad. Sci. U. S. A.* **81**, 3278-3282, doi:10.1073/pnas.81.11.3278  
558 (1984).
- 559 43 Valens, M., Thiel, A. & Boccard, F. The MaoP/*maoS* Site-Specific System Organizes the  
560 Ori Region of the *E. coli* Chromosome into a Macrodomain. *PLoS Genet.* **12**, e1006309-  
561 e1006309, doi:10.1371/journal.pgen.1006309 (2016).
- 562 44 Kim, T., Lee, J. & Kim, K.-s. *Escherichia coli* YmdB regulates biofilm formation  
563 independently of its role as an RNase III modulator. *BMC Microbiol.* **13**, 266-266,  
564 doi:10.1186/1471-2180-13-266 (2013).
- 565 45 Evans, Margery L. *et al.* The Bacterial Curli System Possesses a Potent and Selective  
566 Inhibitor of Amyloid Formation. *Mol. Cell* **57**, 445-455,  
567 doi:<https://doi.org/10.1016/j.molcel.2014.12.025> (2015).
- 568 46 Zhang, Y., Morar, M. & Ealick, S. E. Structural biology of the purine biosynthetic pathway.  
569 *Cell. Mol. Life Sci.* **65**, 3699-3724, doi:10.1007/s00018-008-8295-8 (2008).
- 570 47 Pratt, L. A. & Kolter, R. Genetic analysis of *Escherichia coli* biofilm formation: roles of  
571 flagella, motility, chemotaxis and type I pili. *Mol. Microbiol.* **30**, 285-293, doi:10.1046/j.1365-  
572 2958.1998.01061.x (1998).
- 573 48 Wang, F. *et al.* Flagellar Motility Is Critical for *Salmonella enterica* Serovar Typhimurium  
574 Biofilm Development. *Front. Microbiol.* **11**, doi:10.3389/fmicb.2020.01695 (2020).
- 575 49 Shimada, T., Bridier, A., Briandet, R. & Ishihama, A. Novel roles of LeuO in transcription  
576 regulation of *E. coli* genome: antagonistic interplay with the universal silencer H-NS. *Mol.*  
577 *Microbiol.* **82**, 378-397, doi:10.1111/j.1365-2958.2011.07818.x (2011).
- 578 50 Kroner, G. M., Wolfe, M. B. & Freddolino, P. L. *Escherichia coli* Lrp Regulates One-Third of  
579 the Genome via Direct, Cooperative, and Indirect Routes. *J. Bacteriol.* **201**, e00411-00418,  
580 doi:10.1128/jb.00411-18 (2019).



- 581 51 Tramonti, A., De Canio, M. & De Biase, D. GadX/GadW-dependent regulation of the  
582 *Escherichia coli* acid fitness island: transcriptional control at the *gadY*–*gadW* divergent  
583 promoters and identification of four novel 42 bp GadX/GadW-specific binding sites. *Mol.*  
584 *Microbiol.* **70**, 965-982, doi:10.1111/j.1365-2958.2008.06458.x (2008).
- 585 52 Sukharev, S. I., Blount, P., Martinac, B., Blattner, F. R. & Kung, C. A large-conductance  
586 mechanosensitive channel in *E. coli* encoded by *mscL* alone. *Nature* **368**, 265-268,  
587 doi:10.1038/368265a0 (1994).
- 588 53 Morona, R., Manning, P. A. & Reeves, P. Identification and characterization of the TolC  
589 protein, an outer membrane protein from *Escherichia coli*. *J. Bacteriol.* **153**, 693-699  
590 (1983).
- 591 54 Cai, S. J. & Inouye, M. EnvZ-OmpR interaction and osmoregulation in *Escherichia coli*. *J.*  
592 *Biol. Chem.* **277**, 24155-24161, doi:10.1074/jbc.M110715200 (2002).
- 593 55 Marteyn, B. S. *et al.* ZapE is a novel cell division protein interacting with FtsZ and  
594 modulating the Z-ring dynamics. *mBio* **5**, e00022-00014, doi:10.1128/mBio.00022-14  
595 (2014).
- 596 56 Hamma, T. & Ferré-D'Amaré, A. R. Pseudouridine Synthases. *Chem. Biol.* **13**, 1125-1135,  
597 doi:<https://doi.org/10.1016/j.chembiol.2006.09.009> (2006).
- 598 57 Tsui, H. C., Arps, P. J., Connolly, D. M. & Winkler, M. E. Absence of *hisT*-mediated tRNA  
599 pseudouridylation results in a uracil requirement that interferes with *Escherichia coli* K-12  
600 cell division. *J. Bacteriol.* **173**, 7395-7400, doi:10.1128/jb.173.22.7395-7400.1991 (1991).
- 601 58 Bringer, M. A., Rolhion, N., Glasser, A. L. & Darfeuille-Michaud, A. The oxidoreductase  
602 DsbA plays a key role in the ability of the Crohn's disease-associated adherent-invasive  
603 *Escherichia coli* strain LF82 to resist macrophage killing. *J. Bacteriol.* **189**, 4860-4871,  
604 doi:10.1128/jb.00233-07 (2007).
- 605 59 Magnusson, L. U., Gummesson, B., Joksimović, P., Farewell, A. & Nyström, T. Identical,  
606 Independent, and Opposing Roles of ppGpp and DksA in *Escherichia coli*. *J. Bacteriol.* **189**,  
607 5193-5202, doi:10.1128/jb.00330-07 (2007).

- 608 60 Anwar, N., Rouf, S. F., Römling, U. & Rhen, M. Modulation of Biofilm-Formation in  
609 *Salmonella enterica* Serovar Typhimurium by the Periplasmic DsbA/DsbB Oxidoreductase  
610 System Requires the GGDEF-EAL Domain Protein STM3615. *PLoS One* **9**, e106095,  
611 doi:10.1371/journal.pone.0106095 (2014).
- 612 61 Smith, D. R. *et al.* The Production of Curli Amyloid Fibers Is Deeply Integrated into the  
613 Biology of *Escherichia coli*. *Biomolecules* **7**, 75, doi:10.3390/biom7040075 (2017).
- 614 62 Garavaglia, M., Rossi, E. & Landini, P. The pyrimidine nucleotide biosynthetic pathway  
615 modulates production of biofilm determinants in *Escherichia coli*. *PLoS One* **7**, e31252-  
616 e31252, doi:10.1371/journal.pone.0031252 (2012).
- 617 63 Cepas, V. *et al.* Transposon Insertion in the *purL* Gene Induces Biofilm Depletion in  
618 *Escherichia coli* ATCC 25922. *Pathogens (Basel, Switzerland)* **9**,  
619 doi:10.3390/pathogens9090774 (2020).
- 620 64 Rodrigues, D. F. & Elimelech, M. Role of type 1 fimbriae and mannose in the development  
621 of *Escherichia coli* K12 biofilm: from initial cell adhesion to biofilm formation. *Biofouling* **25**,  
622 401-411, doi:10.1080/08927010902833443 (2009).
- 623 65 Li, S. *et al.* An Osmoregulatory Mechanism Operating through OmpR and LrhA Controls  
624 the Motile-Sessile Switch in the Plant Growth-Promoting Bacterium *Pantoea alhagi*. *Appl.*  
625 *Environ. Microbiol.* **85**, e00077-00019, doi:10.1128/aem.00077-19 (2019).
- 626 66 Barrios, A. F., Zuo, R., Ren, D. & Wood, T. K. Hha, YbaJ, and OmpA regulate *Escherichia*  
627 *coli* K12 biofilm formation and conjugation plasmids abolish motility. *Biotechnol. Bioeng.* **93**,  
628 188-200, doi:10.1002/bit.20681 (2006).
- 629 67 Garcia-Contreras, R., Zhang, X. S., Kim, Y. & Wood, T. K. Protein translation and cell  
630 death: the role of rare tRNAs in biofilm formation and in activating dormant phage killer  
631 genes. *PLoS One* **3**, e2394, doi:10.1371/journal.pone.0002394 (2008).
- 632 68 Sharma, V. K. & Bearson, B. L. Hha controls *Escherichia coli* O157:H7 biofilm formation by  
633 differential regulation of global transcriptional regulators FlhDC and CsgD. *Appl. Environ.*  
634 *Microbiol.* **79**, 2384-2396, doi:10.1128/AEM.02998-12 (2013).

- 635 69 Ogasawara, H., Yamamoto, K. & Ishihama, A. Role of the Biofilm Master Regulator CsgD  
636 in Cross-Regulation between Biofilm Formation and Flagellar Synthesis. *J. Bacteriol.* **193**,  
637 2587-2597, doi:10.1128/jb.01468-10 (2011).
- 638 70 Fang, X. & Gomelsky, M. A post-translational, c-di-GMP-dependent mechanism regulating  
639 flagellar motility. *Mol. Microbiol.* **76**, 1295-1305, doi:10.1111/j.1365-2958.2010.07179.x  
640 (2010).
- 641 71 Nieto, V. *et al.* Under Elevated c-di-GMP in *Escherichia coli*, YcgR Alters Flagellar Motor  
642 Bias and Speed Sequentially, with Additional Negative Control of the Flagellar Regulon via  
643 the Adaptor Protein RssB. *J. Bacteriol.* **202**, e00578-00519, doi:10.1128/JB.00578-19  
644 (2019).
- 645 72 Paul, K., Nieto, V., Carlquist, W. C., Blair, D. F. & Harshey, R. M. The c-di-GMP binding  
646 protein YcgR controls flagellar motor direction and speed to affect chemotaxis by a  
647 "backstop brake" mechanism. *Mol. Cell* **38**, 128-139, doi:10.1016/j.molcel.2010.03.001  
648 (2010).
- 649 73 Pesavento, C. *et al.* Inverse regulatory coordination of motility and curli-mediated adhesion  
650 in *Escherichia coli*. *Genes Dev.* **22**, 2434-2446, doi:10.1101/gad.475808 (2008).
- 651 74 Wood, T. K., González Barrios, A. F., Herzberg, M. & Lee, J. Motility influences biofilm  
652 architecture in *Escherichia coli*. *Appl. Microbiol. Biotechnol.* **72**, 361-367,  
653 doi:10.1007/s00253-005-0263-8 (2006).
- 654 75 Prouty, A. M. & Gunn, J. S. Comparative analysis of *Salmonella enterica* serovar  
655 Typhimurium biofilm formation on gallstones and on glass. *Infect. Immun.* **71**, 7154-7158  
656 (2003).
- 657 76 Samanta, P., Clark, E. R., Knutson, K., Horne, S. M. & Prüß, B. M. OmpR and RcsB  
658 abolish temporal and spatial changes in expression of *flhD* in *Escherichia coli* Biofilm. *BMC*  
659 *Microbiol.* **13**, 182, doi:10.1186/1471-2180-13-182 (2013).
- 660 77 Trampari, E. *et al.* Antibiotics select for novel pathways of resistance in biofilms. *bioRxiv*,  
661 605212, doi:10.1101/605212 (2019).

- 662 78 Barquist, L. *et al.* The TraDIS toolkit: sequencing and analysis for dense transposon mutant  
663 libraries. *Bioinformatics* **32**, 1109-1111, doi:10.1093/bioinformatics/btw022 (2016).
- 664 79 Carver, T., Harris, S. R., Berriman, M., Parkhill, J. & McQuillan, J. A. Artemis: an integrated  
665 platform for visualization and analysis of high-throughput sequence-based experimental  
666 data. *Bioinformatics* **28**, 464-469, doi:10.1093/bioinformatics/btr703 (2011).
- 667
- 668

669 **Figures**

670

671 **Figure 1:** Genes involved in biofilm formation over time in *E. coli*. Expression of genes in green  
 672 were found to be beneficial for, and those in red were found to be detrimental to, biofilm formation.

673

674

***E. coli***

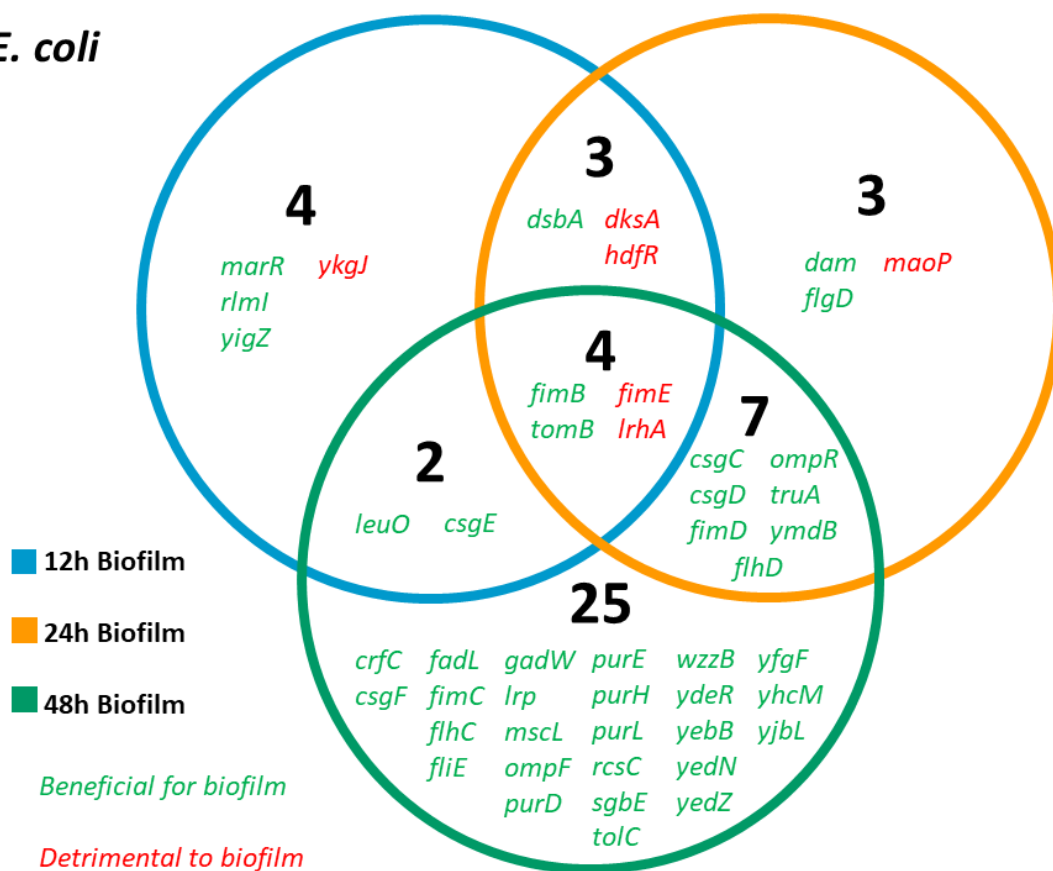

675

676

677

678 **Figure 2:** Mapped reads from TraDIS-Xpress data, plotted with BioTraDIS in Artemis. **a)** Insertion  
679 sites in and around *fimB* and *fimE* in planktonic and biofilm conditions after 12 and 48 hours  
680 growth. **b)** Insertion sites in and around *hdfR*, *IrhA* and *tomB* in planktonic and biofilm conditions  
681 after 24 hours growth. **c)** Insertion sites in and around *dksA* and *dsbA* in planktonic and biofilm  
682 conditions after 12 and 48 hours growth. For all plot files, one of two independent replicates is  
683 shown and the transposon-located promoter is induced with 1mM IPTG in all conditions shown.

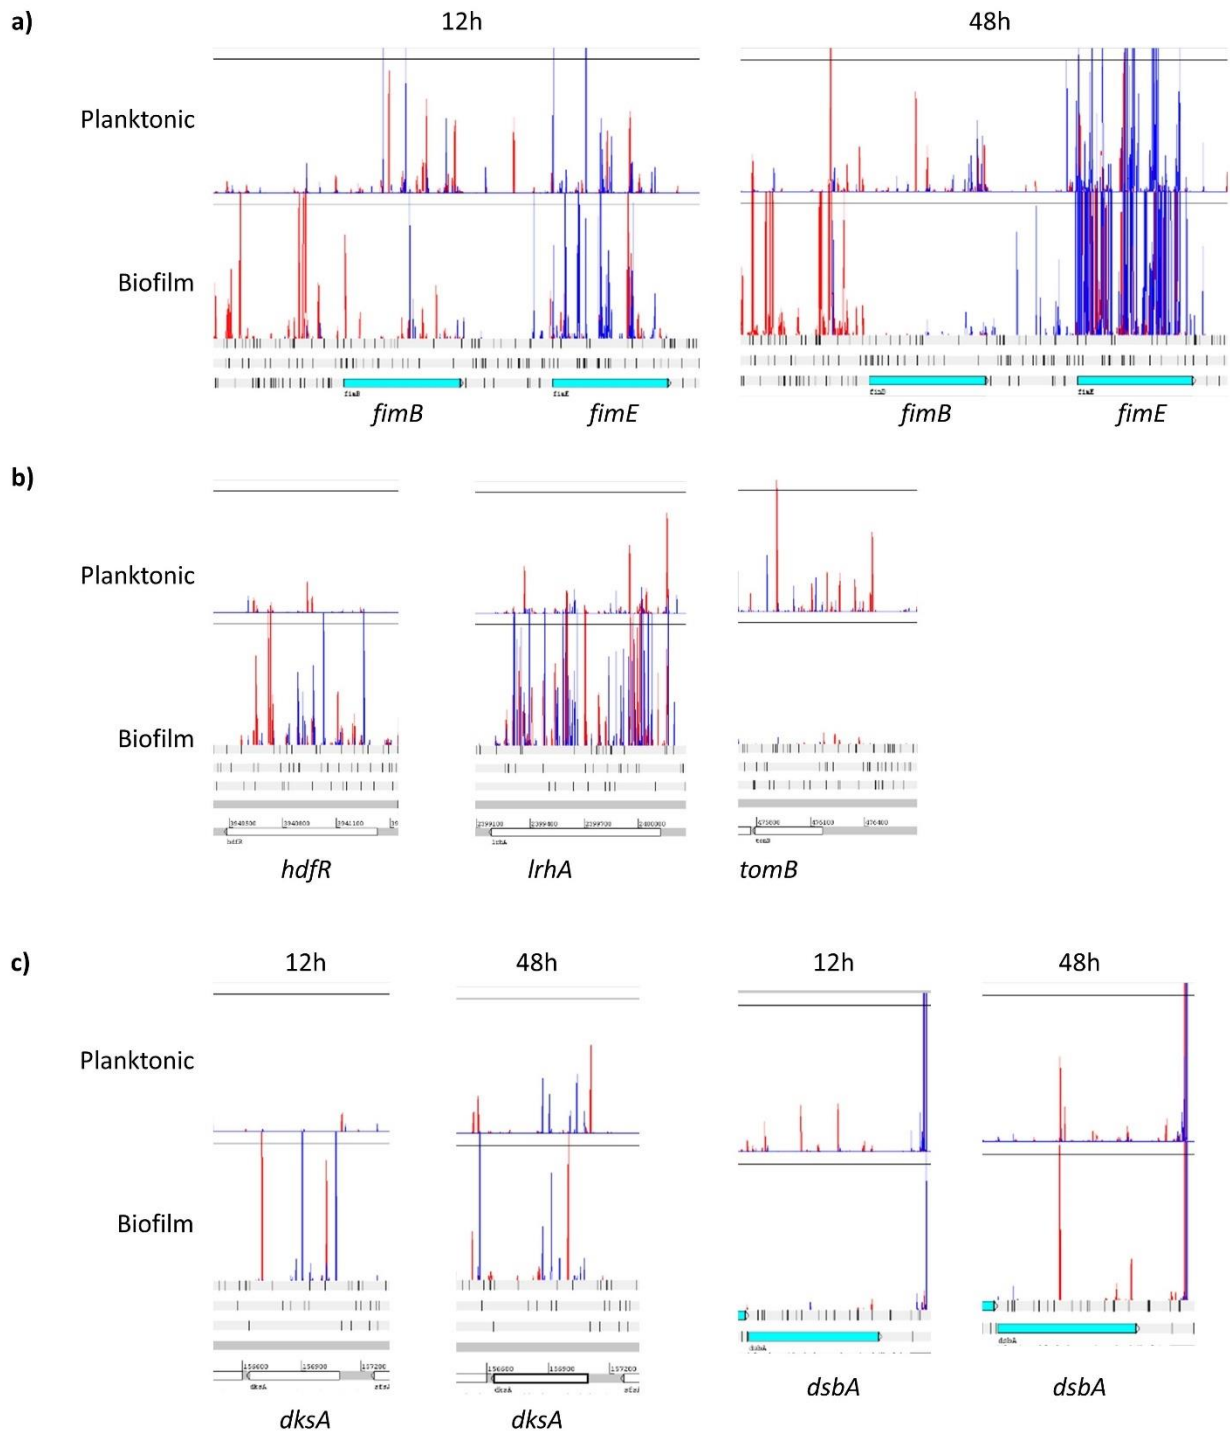

684

685 **Figure 3:** Phenotypic validation of selected genes involved in biofilm formation. **a)** Biofilm biomass  
686 of single knockout mutants relative to wild type *E. coli* BW25113, measured by crystal violet  
687 staining. Two biological and a minimum of two technical replicates were performed for each  
688 mutant. **b)** Cell aggregation of single knockout mutants relative to wild type *E. coli* BW25113,  
689 measured by OD<sub>600 nm</sub> of the supernatant of unagitated cultures. Points show the ODs of three  
690 independent replicates. For both graphs, red points/bars show data from the first KEIO collection  
691 mutant of each gene, and blue points/bars show data from the second mutant. Error bars show  
692 95% confidence intervals and the shaded area shows the 95% confidence interval of the wild type.  
693 Single asterisks (\*) represent a significant difference between one Keio mutant copy and the wild  
694 type, and double asterisks (\*\*) denote a significant difference between both Keio mutant copies  
695 and the wild type (Welch's *t*-test,  $p < 0.05$ ). **c)** Colonies grown on agar supplemented with Congo  
696 red to compare curli biosynthesis between single knockout mutants and the wild type. Images are  
697 representative of 2 biological and 2 technical replicates.

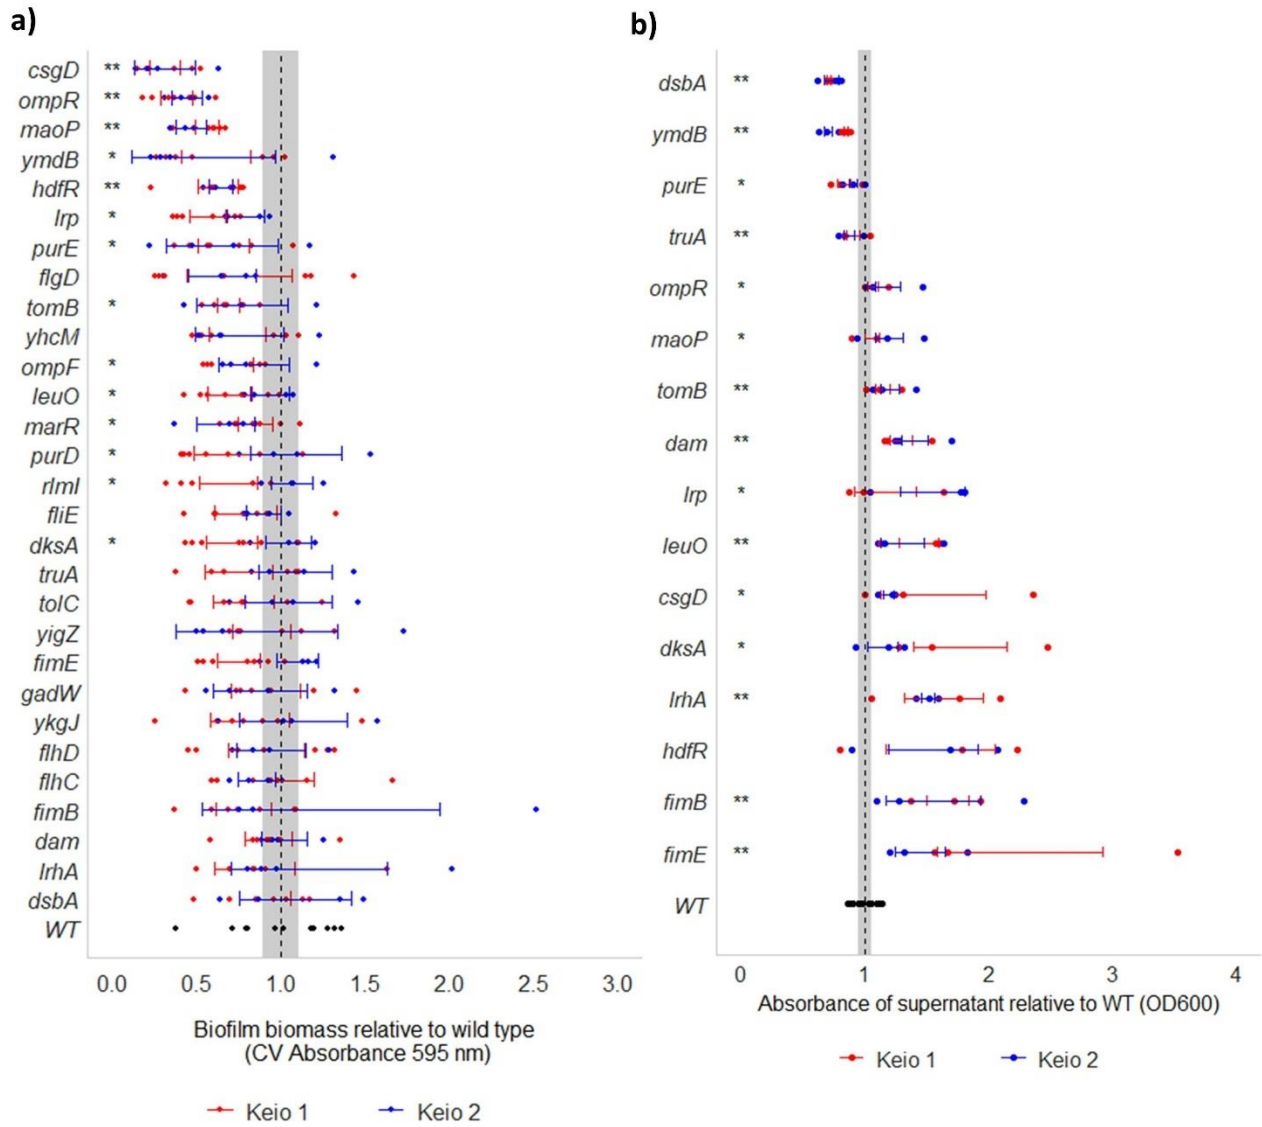

698



699 **Figure 4:** Biofilm formation of single knockout mutants on glass analysed under flow conditions  
700 after 12 and 48 hours growth. 10x Magnification. Images are representative of two independent  
701 replicates. Scale bar indicates 5  $\mu\text{m}$ .

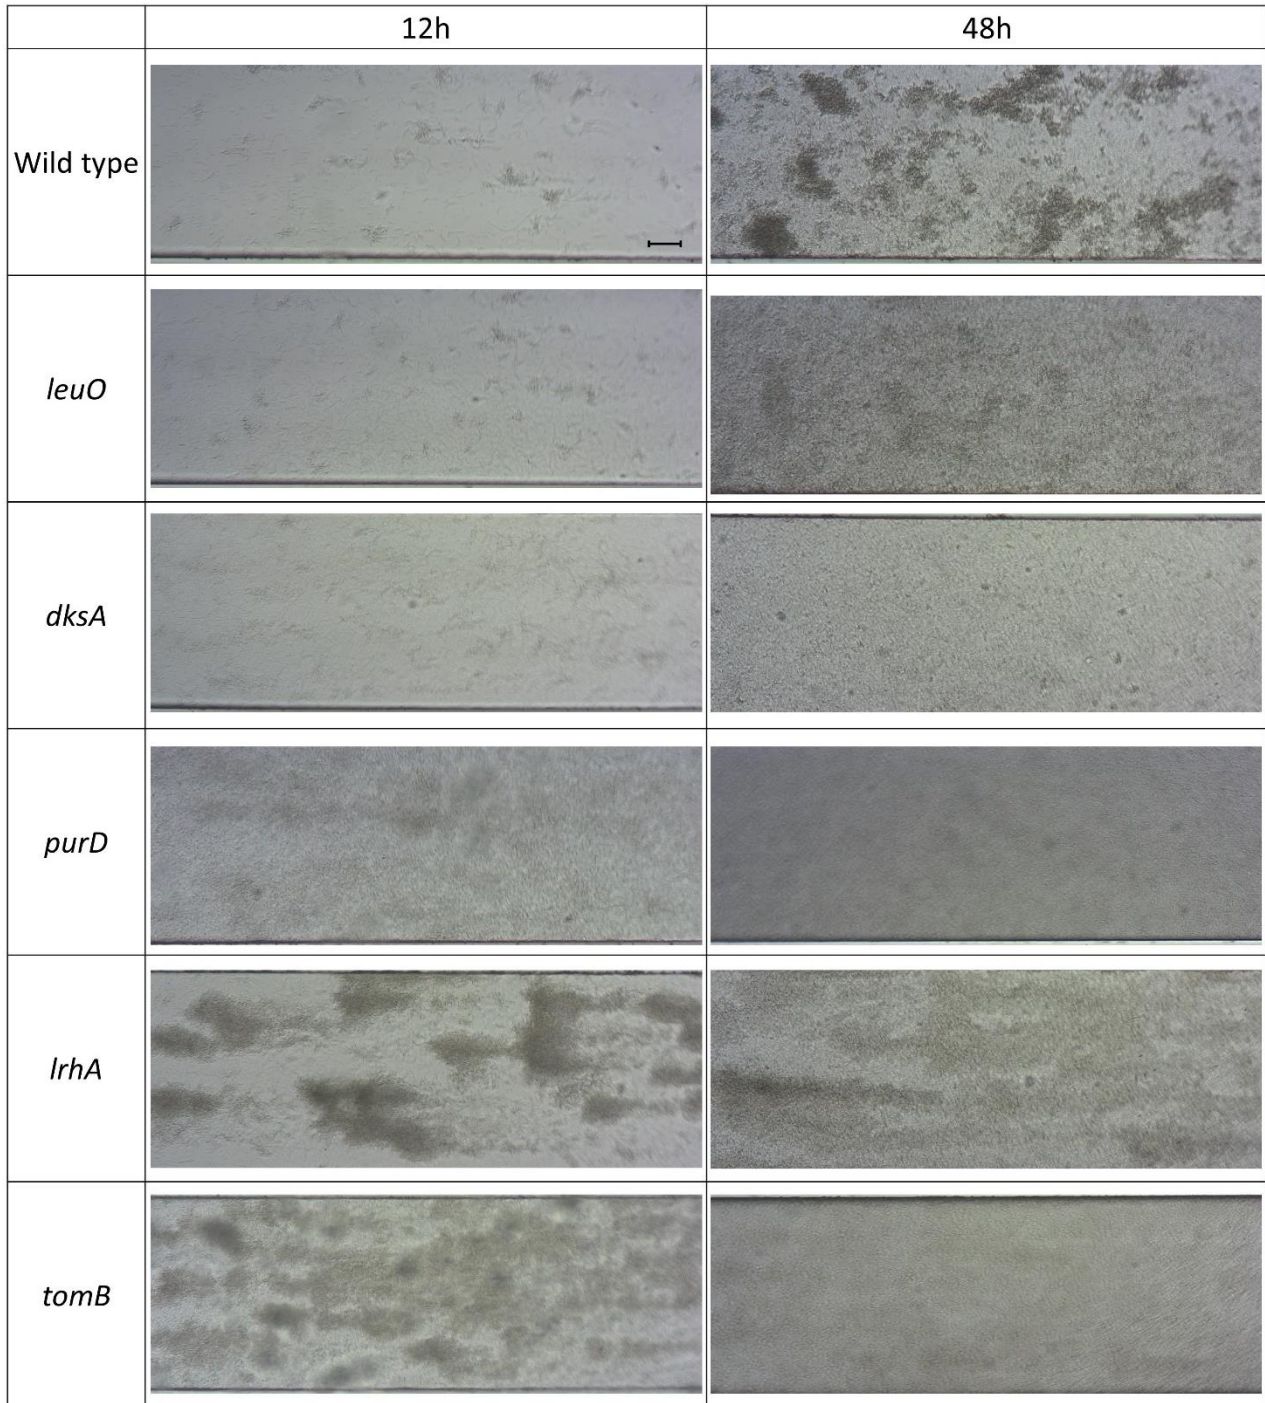

702

703

704 **Figure 5.** Summary of genes important for biofilm formation by *E. coli* at different stages of  
 705 development.

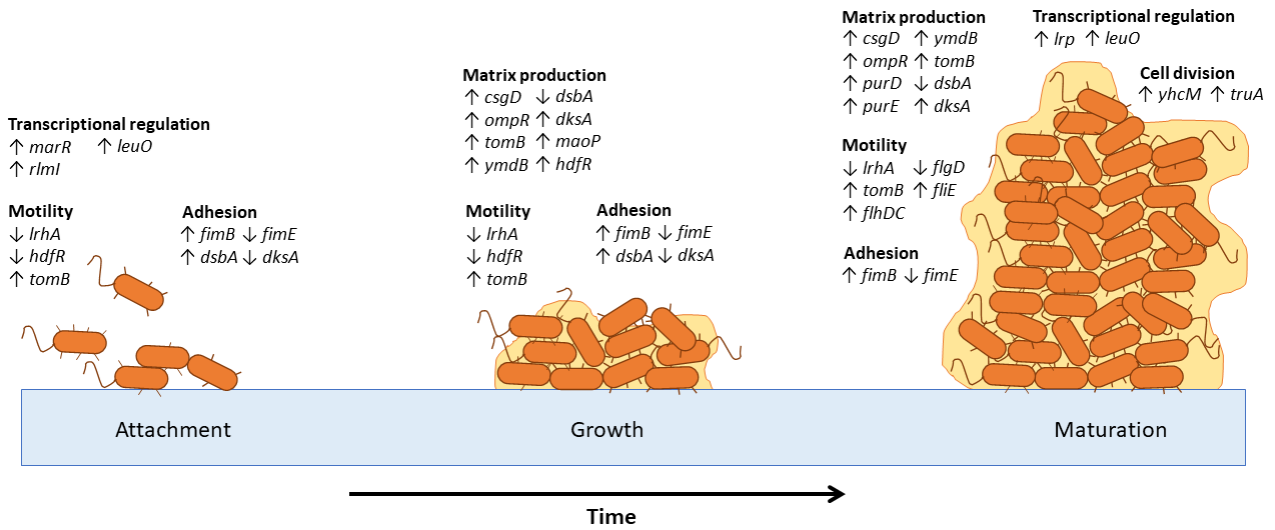

706
